# Supplementary material for: Size control of monodisperse Au nanoparticles synthesized via a citrate reduction process associated with a pH-shifting procedure
Source: Royal Society of Chemistry journal article supplement (doi:10.1039/c3ce41516c), 2013-01-01
Supplement: c3ce41516c.pdf [file c3ce41516c.pdf]

## Supplementary Information

# Size control of monodisperse Au nanoparticles synthesized via citrate reduction process associated with a pH-shifting procedure

Fumiyuki Shiba<sup>\*a</sup>

<sup>a</sup>Graduate School of Advanced Integration Science, Chiba University

1-33 Yoyoicho, Inageku, Chiba 263-8522, Japan

E-mail: shiba@faculty.chiba-u.jp

## 1. Remarks on synthesis

### 1. 1. Materials

All reagents used in the present study were purchased from Wako Pure Chemicals and used as received.

### 1. 2. Synthesis of AuNPs

A flask, heated by a mantle heater, was used as reaction vessel in the present study. Solutions of reactants were introduced with micropipettes (Nichiryo PG-1000 and PG-5000). Only for  $\Delta t = 0$  s, 1.525 mL of a mixed solution, which was preliminarily prepared by mixing 2 mL of H<sub>3</sub>-Cit (0.175 mol/L) and 1.050 mL of NaOH (1 mol/L), was introduced at once to simplify the preparation process. On the synthesis,  $\Delta t$  was controlled through counting beats from a quartz metronome (Seiko SQ-77) at “♩ = 60” (60 beats per minute).

### 1. 3. pH measurement

All the pH values mentioned in the present report were measured after cooling to room temperature.

#### 1. 4. Spectrometry

The wavelengths of maximum absorption were estimated from the absorption spectra of AuNP dispersions that were measured without dilution in a 1-cm cuvette by Shimadzu Multispec-1500 spectrophotometer.

#### 1. 5. TEM observation

Hitachi H-7650 transmission electron microscope was operated at 100 kV to evaluate size and shape of obtained AuNPs.

### 2. Effect of $\Delta t$ on absorption spectrum of AuNPs

The absorption spectra of AuNP dispersions prepared at  $\Delta t = 0, 2, 5, 12$  s are shown in Fig. S1. The wavelength and absorbance at peak maximum tend to decrease by elongating  $\Delta t$  up to 5 s. At  $\Delta t = 12$  s, the absorbance at the longer wavelength region is increased comparing to that for  $\Delta t = 5$  s, resulting in slight increase of the peak wavelength and absorbance.

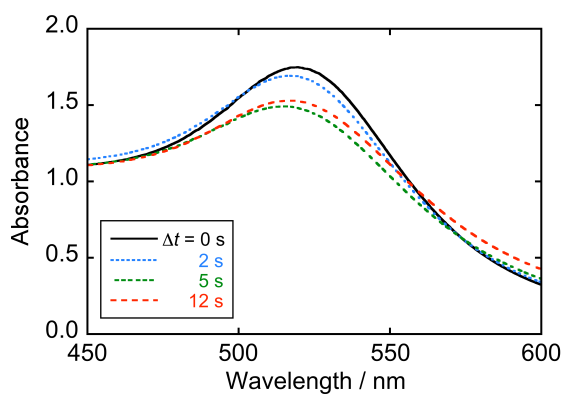

Fig. S1 Absorption spectra of the AuNP dispersions prepared by the pH-shifting procedure under the conditions of  $\Delta t = 0, 2, 5$  and  $12$  s.

### 3. Observation of color change behavior during AuNP formation

The color change behavior during AuNP formation was observed by recording motion images with a digital camera (Olympus E-PL1, 30 fps). The images at certain times, extracted from the motion images, are summarized in Fig. S2, where pH 2.6 and pH 6.3 are the conditions for which H<sub>3</sub>-Cit solution and Na<sub>3</sub>-Cit equivalent one, respectively, are introduced into the boiling HAuCl<sub>4</sub> solution. For pH 3.0, a mixed solution of H<sub>3</sub>-Cit and NaOH (H<sup>+</sup> : Na<sup>+</sup> = 1 : 2) was added. Instead of a flask with a mantle heater, a screw-capped bottle on a hot plate is employed for the convenience of observation.

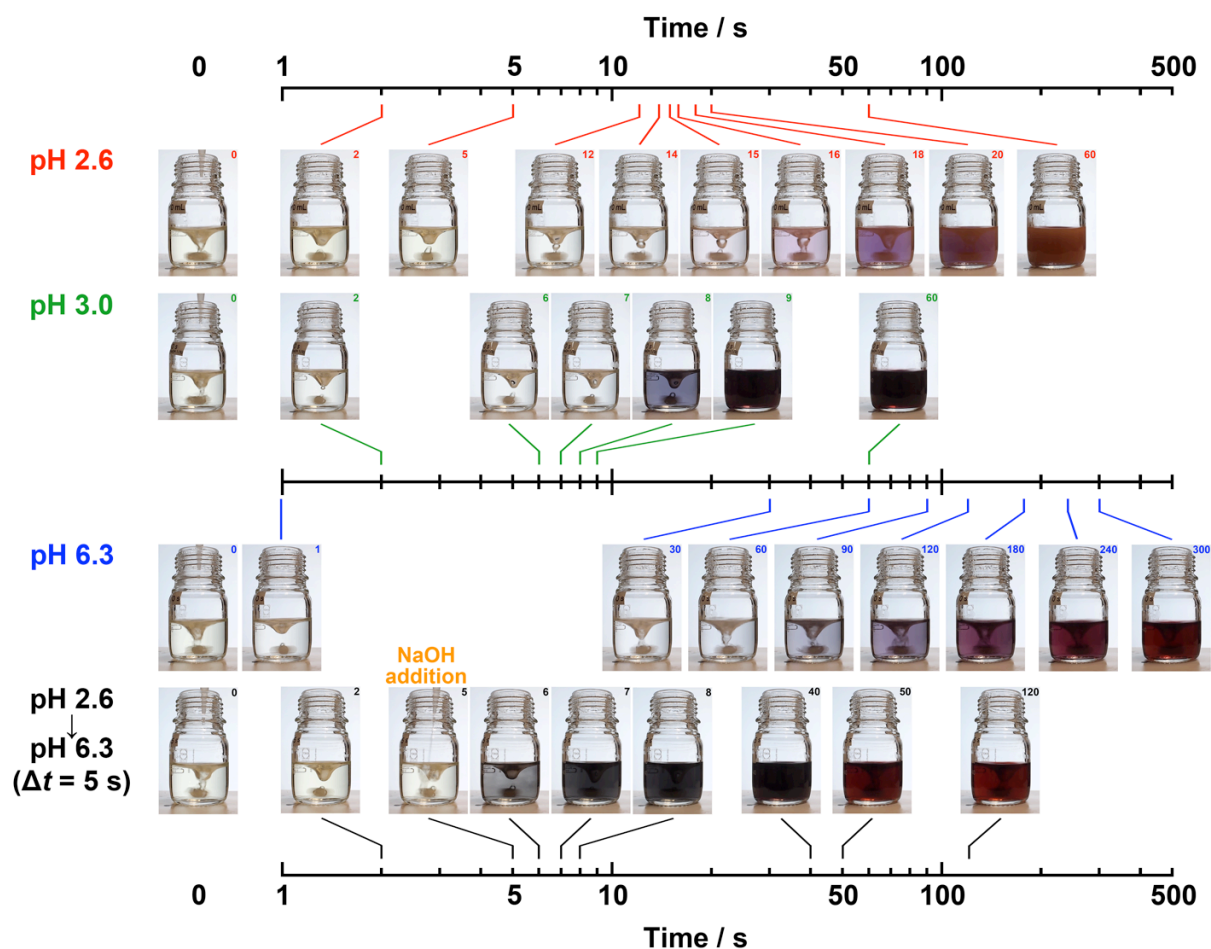

Fig. S2 Comparison of color change behavior among pH conditions related in the present study including the pH-shifting procedure, where pH 2.3 and pH 6.3 are corresponding to the conditions for H<sub>3</sub>-Cit and Na<sub>3</sub>-Cit additions, respectively.
